# Supplementary material
Source: PubMed Central journal article supplement (PMC10227892)

**Table S1. Missing data**

| Characteristic                                                  | Missing values (%)            |                               | Approach to missing data                                         |
|-----------------------------------------------------------------|-------------------------------|-------------------------------|------------------------------------------------------------------|
|                                                                 | Derivation<br>[N=417,972<br>] | Validation<br>[N=417,974<br>] |                                                                  |
| <b><i>Chronic model</i></b>                                     |                               |                               |                                                                  |
| Age                                                             | 0 (0.0)                       | 0 (0.0)                       | N/A                                                              |
| Sex                                                             | 0 (0.0)                       | 0 (0.0)                       | N/A                                                              |
| BMI                                                             | 45,913<br>(11.0)              | 45,994<br>(11.0)              | Single imputation to population mean                             |
| Dependency prior to hospital admission                          | 2,624 (0.6)                   | 2,731 (0.7)                   | Separate variable for no evidence to assess past medical history |
| Severe comorbidities                                            | 2,624 (0.6)                   | 2,731 (0.7)                   | Separate variable for no evidence to assess past medical history |
| Residence prior to admission                                    | 8 (<0.01)                     | 4 (<0.01)                     | Assumed "Home"                                                   |
| Index of Multiple Deprivation                                   | 3,853 (0.9)                   | 3,974 (1.0)                   | Separate categories for non-UK and unknown                       |
| <b><i>Acute model</i></b>                                       |                               |                               |                                                                  |
| Source of admission to the critical care unit                   | 0 (0.0)                       | 0 (0.0)                       | N/A                                                              |
| CPR within 24 hours prior to admission                          | 10 (0.0)                      | 6 (0.0)                       | Assumed "No"                                                     |
| LOS in hospital prior to admission                              | 0 (0.0)                       | 0 (0.0)                       | N/A                                                              |
| Primary reason for admission                                    | 16 (<0.01)                    | 14 (<0.01)                    | Excluded                                                         |
| Level 3 care received                                           | 1,234 (0.3)                   | 1,220 (0.3)                   | Assumed "No"                                                     |
| Mechanical ventilation                                          | 2,341 (0.6)                   | 2,395 (0.6)                   | Assumed "No"                                                     |
| Neurological status                                             | 13,144 (3.1)                  | 13,223 (3.2)                  | MI (ordered logit)                                               |
| Highest heart rate                                              | 2,023 (0.5)                   | 2,063 (0.5)                   | MI (linear)                                                      |
| Lowest respiratory rate                                         | 2,341 (0.6)                   | 2,395 (0.6)                   | MI (log-linear)                                                  |
| Lowest systolic blood pressure                                  | 2,077 (0.5)                   | 2,127 (0.5)                   | MI (linear)                                                      |
| Highest temperature                                             | 3,086 (0.7)                   | 3,151 (0.8)                   | MI (linear)                                                      |
| PaO <sub>2</sub> /FiO <sub>2</sub> with lowest PaO <sub>2</sub> | 46,984<br>(11.2)              | 47,527<br>(11.4)              | MI (log-linear)                                                  |
| Lowest pH                                                       | 46,964<br>(11.2)              | 47,514<br>(11.4)              | MI (linear)                                                      |
| PaCO <sub>2</sub> associated with lowest pH                     | 47,007<br>(11.2)              | 47,553<br>(11.4)              | MI (log-linear)                                                  |
| Highest blood lactate                                           | 52,554<br>(12.6)              | 53,164<br>(12.7)              | MI (log-linear)                                                  |
| Urine output                                                    | 12,341 (3.0)                  | 12,353 (3.0)                  | MI (log-linear)                                                  |
| Highest serum sodium                                            | 15,096 (3.6)                  | 15,275 (3.7)                  | MI (linear)                                                      |
| Highest serum urea                                              | 19,470 (4.7)                  | 19,416 (4.6)                  | MI (log-linear)                                                  |
| Highest serum creatinine                                        | 18,154 (4.3)                  | 18,202 (4.4)                  | MI (log-linear)                                                  |
| Lowest white blood cell count                                   | 18,192 (4.4)                  | 18,183 (4.4)                  | MI (log-linear)                                                  |
| Lowest platelet count                                           | 18,396 (4.4)                  | 18,266 (4.4)                  | MI (log-linear)                                                  |

BMI: body mass index; CPR: cardiopulmonary resuscitation; LOS: length of stay; MI: multiple imputation using fully conditional specification; N/A: not applicable

**Table S2. Chronic model (day 0)**

| Characteristic                                           | Mean (SD)<br>or n (%) | Coefficient (95% CI)       | P value |
|----------------------------------------------------------|-----------------------|----------------------------|---------|
| Constant                                                 | -                     | -2.357 (-2.582,<br>-2.134) | <0.001  |
| Age (years) – RCS(26, 57, 71, 85)                        | 61.5 (17.8)           |                            | <0.001  |
| <i>age</i> <sub>1</sub>                                  |                       | 0.037 (0.034, 0.041)       |         |
| <i>age</i> <sub>2</sub>                                  |                       | -0.009 (-0.014,<br>-0.004) |         |
| <i>age</i> <sub>3</sub>                                  |                       | 0.036 (0.008, 0.064)       |         |
| Sex                                                      |                       |                            | <0.001  |
| Female                                                   | 187,459<br>(44.8)     | 0                          |         |
| Male                                                     | 230,513<br>(55.2)     | 0.129 (0.102, 0.156)       |         |
| BMI (kg m <sup>-2</sup> ) – RCS(19.2, 24.5, 27.3, 39.0)  | 27.1 (6.4)            |                            | <0.001  |
| <i>bmi</i> <sub>1</sub>                                  |                       | -0.052 (-0.060,<br>-0.044) |         |
| <i>bmi</i> <sub>2</sub>                                  |                       | 0.058 (0.016, 0.099)       |         |
| <i>bmi</i> <sub>3</sub>                                  |                       | -0.056 (-0.201, 0.088)     |         |
| Dependency prior to hospital admission                   | -                     |                            | <0.001  |
| Able to live without assistance in ADL                   | 318,536<br>(76.2)     | 0                          |         |
| Minor/major assistance with ADL                          | 95,628 (22.9)         | 0.521 (0.457, 0.585)       |         |
| Total assistance with all ADL                            | 3,808 (0.9)           | 0.820 (0.719, 0.921)       |         |
| Severe comorbidities <sup>a</sup>                        |                       |                            |         |
| Cardiovascular                                           | 7,387 (1.8)           | 0.310 (0.235, 0.386)       | <0.001  |
| Respiratory                                              | 11,066 (2.6)          | 0.352 (0.290, 0.415)       | <0.001  |
| Renal                                                    | 8,005 (1.9)           | 0.261 (0.181, 0.342)       | <0.001  |
| Hepatic                                                  | 10,666 (2.6)          | 1.345 (1.198, 1.492)       | <0.001  |
| Haematological malignancy                                | 8,130 (1.9)           | 1.172 (1.082, 1.262)       | <0.001  |
| Metastatic cancer                                        | 13,519 (3.2)          | 0.075 (-0.027, 0.177)      | 0.15    |
| Immunocompromise                                         | 31,166 (7.5)          | 0.042 (-0.020, 0.103)      | 0.19    |
| No evidence to assess past medical history               | 2,624 (0.6)           | 0.784 (0.642, 0.926)       | <0.001  |
| Residence prior to admission                             |                       |                            | <0.001  |
| Home                                                     | 409,035<br>(97.9)     | 0                          |         |
| Nursing home or health-related institution               | 7,211 (1.7)           | 0.084 (0.016, 0.152)       |         |
| Hospice                                                  | 61 (0.0)              | -0.010 (-0.606, 0.586)     |         |
| No fixed abode or temporary abode                        | 1,665 (0.4)           | 0.289 (0.130, 0.447)       |         |
| Index of Multiple Deprivation <sup>b</sup> (by quintile) |                       |                            | <0.001  |
| 1 (least deprived)                                       | 67,687 (16.2)         | 0                          |         |
| 2                                                        | 75,653 (18.1)         | 0.008 (-0.031, 0.047)      |         |
| 3                                                        | 82,943 (19.8)         | 0.032 (-0.014, 0.077)      |         |
| 4                                                        | 88,091 (21.1)         | 0.120 (0.071, 0.170)       |         |
| 5 (most deprived)                                        | 99,745 (23.9)         | 0.203 (0.143, 0.262)       |         |
| Non-UK                                                   | 2,126 (0.5)           | 0.106 (-0.107, 0.319)      |         |
| Unknown                                                  | 1,727 (0.4)           | 0.520 (0.337, 0.703)       |         |
| Time since 1 April 2009 (per year)                       | -                     | -0.051 (-0.061,<br>-0.041) | <0.001  |
| Month of admission                                       |                       |                            | <0.001  |
| January                                                  | 35,946 (8.6)          | 0                          |         |
| February                                                 | 33,636 (8.0)          | -0.050 (-0.086,            |         |

|           |              |                         |
|-----------|--------------|-------------------------|
|           |              | -0.013)                 |
| March     | 37,101 (8.9) | -0.066 (-0.102, -0.030) |
| April     | 32,447 (7.8) | -0.087 (-0.125, -0.050) |
| May       | 34,375 (8.2) | -0.161 (-0.199, -0.123) |
| June      | 33,777 (8.1) | -0.199 (-0.236, -0.161) |
| July      | 35,191 (8.4) | -0.234 (-0.274, -0.195) |
| August    | 33,452 (8.0) | -0.159 (-0.198, -0.120) |
| September | 34,151 (8.2) | -0.223 (-0.257, -0.189) |
| October   | 36,505 (8.7) | -0.156 (-0.194, -0.118) |
| November  | 35,488 (8.5) | -0.116 (-0.151, -0.081) |
| December  | 35,903 (8.6) | -0.004 (-0.042, 0.034)  |

ADL, activities of daily living; BMI, body mass index; CI, confidence interval; RCS( $k_1, \dots, k_n$ ), restricted cubic spline with knots at positions  $k_1, \dots, k_n$ ; SD, standard deviation

<sup>a</sup> APACHE II definitions, evident in 6 months prior to admission

<sup>b</sup> IMD 2015 for England, Welsh IMD 2014 for Wales, Northern Ireland Multiple Deprivation Measure 2010 for Northern Ireland

Restricted cubic spline base variables  $x_1, \dots, x_{n-1}$  for covariate  $x$  with knots at  $k_1, \dots, k_n$  are calculated as:

$$x_1 = x$$

$$x_{j+1} = \{\max(x - k_j, 0)\}^3 - [(k_n - k_j) * \max(x - k_{n-1}, 0)]^3 - (k_{n-1} - k_j) * \max(x - k_n, 0)\}^3 / \{(k_n - k_1)^2\}, j = 1, \dots, n-2$$

**Table S3. Acute model (day 0)**

| Characteristic                                                          | Mean (SD)<br>or n (%) | Coefficient (95% CI)    | P value |
|-------------------------------------------------------------------------|-----------------------|-------------------------|---------|
| Constant                                                                | -                     | 27.288 (24.777, 29.798) | <0.001  |
| Source of admission to the critical care unit                           |                       |                         | <0.001  |
| ED or not in hospital                                                   | 111,839<br>(26.8)     | 0                       |         |
| Theatre – planned admission following elective/scheduled surgery        | 88,499 (21.2)         | -1.095 (-1.179, -1.010) |         |
| Theatre – unplanned admission following elective/scheduled surgery      | 18,326 (4.4)          | -0.689 (-0.776, -0.603) |         |
| Theatre – admission following emergency/urgent surgery                  | 78,910 (18.9)         | -0.302 (-0.352, -0.253) |         |
| Ward or intermediate care area                                          | 120,382<br>(28.8)     | 0.176 (0.139, 0.212)    |         |
| CPR within 24 hours prior to admission                                  |                       |                         | <0.001  |
| No CPR                                                                  | 392,247<br>(93.8)     | 0                       |         |
| In-hospital CPR                                                         | 13,318 (3.2)          | 0.466 (0.400, 0.531)    |         |
| Out-of-hospital CPR                                                     | 12,391 (3.0)          | 0.985 (0.890, 1.079)    |         |
| LOS in hospital prior to admission (days)                               |                       |                         | <0.001  |
| 0                                                                       | 205,007<br>(49.0)     | 0                       |         |
| 1                                                                       | 103,058<br>(24.7)     | 0.134 (0.100, 0.167)    |         |
| 2-7                                                                     | 75,251 (18.0)         | 0.511 (0.477, 0.544)    |         |
| 8 or more                                                               | 34,640 (8.3)          | 1.019 (0.976, 1.061)    |         |
| Primary reason for admission                                            | -                     |                         | <0.001  |
| Individual conditions:                                                  |                       |                         |         |
| Acute alcoholic hepatitis                                               | 576 (0.1)             | 1.105 (0.745, 1.465)    |         |
| Acute cholecystitis, gangrenous gall bladder or empyema of gall bladder | 415 (0.1)             | -0.236 (-0.675, 0.204)  |         |
| Anaphylaxis                                                             | 1,424 (0.3)           | -1.421 (-1.849, -0.994) |         |
| Anoxic or ischaemic coma or encephalopathy                              | 3,235 (0.8)           | 1.120 (0.735, 1.505)    |         |
| Asthma attack                                                           | 4,884 (1.2)           | -1.540 (-1.868, -1.213) |         |
| Berry or other intracranial aneurysm                                    | 938 (0.2)             | 0.557 (0.021, 1.092)    |         |
| COPD with acute lower respiratory infection                             | 3,238 (0.8)           | 0.343 (0.037, 0.649)    |         |
| Hanging or strangulation                                                | 660 (0.2)             | 0.845 (0.503, 1.188)    |         |
| Intracerebral haemorrhage                                               | 3,405 (0.8)           | 2.447 (2.136, 2.757)    |         |
| Lower limb artery stenosis or occlusion                                 | 3,060 (0.7)           | 0.682 (0.368, 0.996)    |         |
| Multiple rib fractures                                                  | 1,354 (0.3)           | -0.124 (-0.456, 0.208)  |         |
| Non-traumatic subdural haemorrhage                                      | 896 (0.2)             | 1.667 (1.348, 1.987)    |         |
| Pneumonia, no organism isolated                                         | 27,961 (6.7)          | 0.527 (0.243, 0.811)    |         |
| Pulmonary fibrosis or fibrosing alveolitis                              | 607 (0.1)             | 2.456 (2.118, 2.794)    |         |
| Secondary hydrocephalus                                                 | 219 (0.1)             | 1.297 (0.836, 1.757)    |         |
| Toxic or drug induced coma or                                           | 1,853 (0.4)           | -0.380 (-0.731, -0.029) |         |

| encephalopathy                                                                                |              |                         |
|-----------------------------------------------------------------------------------------------|--------------|-------------------------|
| For all other admissions, by process (system):                                                |              |                         |
| Accidental intoxication or poisoning (endocrine)                                              | 1,836 (0.4)  | -1.041 (-1.390, -0.693) |
| Acidaemia (endocrine)                                                                         | 1,141 (0.3)  | -0.201 (-0.530, 0.128)  |
| Burns or hyperthermia (dermatological)                                                        | 353 (0.1)    | 0.625 (0.177, 1.074)    |
| Collapse (respiratory)                                                                        | 1,562 (0.4)  | 0.130 (-0.209, 0.469)   |
| Coma or encephalopathy (neurological)                                                         | 2,095 (0.5)  | 0.282 (-0.013, 0.577)   |
| Congenital or acquired deformity or abnormality (cardiovascular)                              | 596 (0.1)    | 0                       |
| Congenital or acquired deformity or abnormality (musculoskeletal)                             | 7,636 (1.8)  | -0.674 (-1.019, -0.330) |
| Congenital or acquired deformity or abnormality (neurological)                                | 2,126 (0.5)  | -0.132 (-0.496, 0.232)  |
| Congenital or acquired deformity or abnormality (respiratory)                                 | 2,705 (0.6)  | 0.279 (-0.029, 0.588)   |
| Congenital or acquired deformity or abnormality (other)                                       | 7,358 (1.8)  | -0.142 (-0.455, 0.171)  |
| Degeneration (cardiovascular)                                                                 | 134 (0.0)    | -0.110 (-0.702, 0.481)  |
| Degeneration (neurological)                                                                   | 158 (0.0)    | 1.336 (0.878, 1.795)    |
| Diabetes mellitus (endocrine)                                                                 | 6,622 (1.6)  | -1.684 (-1.999, -1.369) |
| Dissection or aneurysm (cardiovascular)                                                       | 12,167 (2.9) | 0.377 (0.087, 0.668)    |
| Failure (cardiovascular)                                                                      | 3,722 (0.9)  | 0.480 (0.183, 0.777)    |
| Failure (genitourinary)                                                                       | 16,649 (4.0) | 0.050 (-0.241, 0.342)   |
| Haemolysis or thrombocytopaenia (haematological/immunological)                                | 378 (0.1)    | 0.021 (-0.404, 0.446)   |
| Haemorrhage (cardiovascular)                                                                  | 468 (0.1)    | -0.108 (-0.584, 0.369)  |
| Haemorrhage (gastrointestinal)                                                                | 9,402 (2.3)  | 0.254 (-0.034, 0.541)   |
| Haemorrhage (genitourinary)                                                                   | 3,093 (0.7)  | -1.393 (-1.777, -1.010) |
| Haemorrhage (neurological)                                                                    | 3,796 (0.9)  | 1.957 (1.634, 2.280)    |
| Haemorrhage (respiratory)                                                                     | 569 (0.1)    | 0.182 (-0.200, 0.564)   |
| Hyperkalaemia (endocrine)                                                                     | 971 (0.2)    | -0.157 (-0.483, 0.169)  |
| Hypertension (cardiovascular) or over- or under-activity (cardiovascular or gastrointestinal) | 10,766 (2.6) | 0.141 (-0.128, 0.410)   |
| Hypokalaemia (endocrine)                                                                      | 518 (0.1)    | -0.114 (-0.530, 0.301)  |
| Hyponatraemia (endocrine)                                                                     | 950 (0.2)    | -0.688 (-1.049, -0.327) |
| Hypoplasia or dysplasia (haematological/immunological)                                        | 373 (0.1)    | 0.502 (0.099, 0.905)    |
| Hypothermia (endocrine)                                                                       | 424 (0.1)    | 0.005 (-0.378, 0.387)   |
| Infection (cardiovascular)                                                                    | 1,302 (0.3)  | 0.245 (-0.074, 0.565)   |
| Infection (genitourinary)                                                                     | 6,491 (1.6)  | -0.402 (-0.697, -0.107) |
| Infection (respiratory)                                                                       | 19,194 (4.6) | 0.299 (0.014, 0.584)    |
| Infection (other)                                                                             | 23,689 (5.7) | 0.005 (-0.278, 0.288)   |
| Inflammation (gastrointestinal)                                                               | 9,793 (2.3)  | 0.324 (0.030, 0.618)    |
| Inflammation (neurological)                                                                   | 685 (0.2)    | -0.319 (-0.705, 0.068)  |
| Inflammation (respiratory)                                                                    | 375 (0.1)    | 0.596 (0.155, 1.037)    |
| Inflammation (other)                                                                          | 10,444 (2.5) | 0.111 (-0.182, 0.405)   |
| Obstruction (cardiovascular)                                                                  | 14,446 (3.5) | 0.380 (0.112, 0.648)    |

|                                                                       |                   |                               |        |
|-----------------------------------------------------------------------|-------------------|-------------------------------|--------|
| Obstruction (gastrointestinal)                                        | 15,265 (3.7)      | 0.235 (-0.050, 0.521)         |        |
| Obstruction (genitourinary)                                           | 2,215 (0.5)       | -0.294 (-0.621, 0.033)        |        |
| Obstruction (respiratory)                                             | 5,965 (1.4)       | 0.087 (-0.209, 0.383)         |        |
| Other endocrine processes <sup>a</sup><br>(endocrine)                 | 1,785 (0.4)       | -0.434 (-0.776, -0.092)       |        |
| Seizures (neurological)                                               | 9,792 (2.3)       | -0.481 (-0.777, -0.186)       |        |
| Self intoxication or self poisoning<br>(endocrine)                    | 13,802 (3.3)      | -1.346 (-1.651, -1.042)       |        |
| Shock or hypotension<br>(cardiovascular)                              | 6,995 (1.7)       | 0.337 (0.048, 0.626)          |        |
| Transplant or related<br>(gastrointestinal)                           | 1,640 (0.4)       | -1.658 (-1.994, -1.323)       |        |
| Transplant or related (other)                                         | 688 (0.2)         | -0.431 (-0.899, 0.037)        |        |
| Trauma, perforation or rupture<br>(cardiovascular)                    | 1,225 (0.3)       | 0.117 (-0.203, 0.436)         |        |
| Trauma, perforation or rupture<br>(gastrointestinal)                  | 21,081 (5.0)      | 0.136 (-0.145, 0.417)         |        |
| Trauma, perforation or rupture<br>(neurological)                      | 6,583 (1.6)       | 1.061 (0.770, 1.353)          |        |
| Trauma, perforation or rupture<br>(other)                             | 13,179 (3.2)      | 0.151 (-0.140, 0.441)         |        |
| Tumour or malignancy<br>(genitourinary)                               | 14,413 (3.5)      | -0.044 (-0.348, 0.261)        |        |
| Tumour or malignancy<br>(haematological/immunological)                | 1,430 (0.3)       | 0.499 (0.173, 0.824)          |        |
| Tumour or malignancy (neurological)                                   | 5,251 (1.3)       | 0.506 (0.190, 0.823)          |        |
| Tumour or malignancy (other)                                          | 46,947 (11.2)     | 0.542 (0.259, 0.826)          |        |
| Vascular (cardiovascular)                                             | 77 (0.0)          | 0.026 (-0.773, 1.353)         |        |
| Vascular (gastrointestinal)                                           | 3,391 (0.8)       | 0.607 (0.309, 0.905)          |        |
| Vascular (neurological)                                               | 5,784 (1.4)       | 1.120 (0.824, 1.416)          |        |
| Vascular (genitourinary)                                              | 546 (0.1)         | -1.039 (-1.634, -0.444)       |        |
| Level 3 care received                                                 | 188,160<br>(45.0) | 0.069 (0.026, 0.113)          | 0.002  |
| Mechanical ventilation                                                | 160,717<br>(38.5) | 0.106 (0.062, 0.150)          | 0.001  |
| Neurological status                                                   |                   |                               | <0.001 |
| Lowest GCS 15                                                         | 232,034<br>(57.3) | 0                             |        |
| Lowest GCS 14                                                         | 40,396 (10.0)     | 0.363 (0.316, 0.409)          |        |
| Lowest GCS 7–13                                                       | 44,950 (11.1)     | 0.614 (0.565, 0.663)          |        |
| Lowest GCS 4–6                                                        | 6,692 (1.7)       | 1.251 (1.153, 1.348)          |        |
| Lowest GCS 3                                                          | 10,161 (2.5)      | 1.881 (1.729, 2.033)          |        |
| Sedated for entire of first 24 hours                                  | 70,589 (17.4)     | 0.804 (0.760, 0.849)          |        |
| Highest heart rate (min <sup>-1</sup> ) –<br>RCS(70, 94, 111, 147)    | 104.9 (23.4)      |                               | <0.001 |
| <i>hr</i> <sub>1</sub>                                                |                   | 0.0009 (-0.0011, 0.0029)      |        |
| <i>hr</i> <sub>2</sub>                                                |                   | 0.0213 (0.0147, 0.0280)       |        |
| <i>hr</i> <sub>3</sub>                                                |                   | -0.0693 (-0.0899,<br>-0.0487) |        |
| Lowest respiratory rate (min <sup>-1</sup> ) –<br>RRCS(8, 11, 14, 20) | 12.9 (4.1)        |                               | <0.001 |
| <i>rr</i> <sub>1</sub>                                                |                   | -0.0776 (-0.0840,<br>-0.0712) |        |
| <i>rr</i> <sub>2</sub>                                                |                   | -0.0022 (-0.0064, 0.0020)     |        |

|                                                                                                |             |                                  |        |
|------------------------------------------------------------------------------------------------|-------------|----------------------------------|--------|
| <i>rr</i> <sub>3</sub>                                                                         |             | 0.0034 (0.0004, 0.0065)          |        |
| <i>rr</i> <sub>4</sub>                                                                         |             | -0.0018 (-0.0029,<br>-0.0007)    |        |
| <i>rr</i> <sub>5</sub>                                                                         |             | 0.00041 (0.00030,<br>0.00053)    |        |
| Lowest systolic blood pressure (mmHg) –<br>RCS(65, 88, 100, 130)                               | 95.6 (20.0) |                                  | <0.001 |
| <i>sbp</i> <sub>1</sub>                                                                        |             | -0.0271 (-0.0290,<br>-0.0253)    |        |
| <i>sbp</i> <sub>2</sub>                                                                        |             | 0.0444 (0.0384, 0.0504)          |        |
| <i>sbp</i> <sub>3</sub>                                                                        |             | -0.1260 (-0.1526,<br>-0.0994)    |        |
| Highest temperature (°C) –<br>RCS(36.0, 37.2, 38.0, 39.2)                                      | 37.6 (1.0)  |                                  | <0.001 |
| <i>temp</i> <sub>1</sub>                                                                       |             | -0.328 (-0.378, -0.278)          |        |
| <i>temp</i> <sub>2</sub>                                                                       |             | 0.185 (0.043, 0.328)             |        |
| <i>temp</i> <sub>3</sub>                                                                       |             | -0.040 (-0.555, 0.476)           |        |
| PaO <sub>2</sub> /FiO <sub>2</sub> with lowest PaO <sub>2</sub> (kPa) –<br>RCS(10, 26, 40, 63) | 34.4 (17.1) |                                  | <0.001 |
| <i>pf</i> <sub>1</sub>                                                                         |             | -0.0308 (-0.0340,<br>-0.0276)    |        |
| <i>pf</i> <sub>2</sub>                                                                         |             | 0.0374 (0.0251, 0.0497)          |        |
| <i>pf</i> <sub>3</sub>                                                                         |             | -0.0743 (-0.1100,<br>-0.0386)    |        |
| Lowest pH (per 0.1) –<br>RCS(7.07, 7.29, 7.36, 7.45)                                           | 7.31 (0.12) |                                  | <0.001 |
| <i>ph</i> <sub>1</sub>                                                                         |             | -0.110 (-0.137, -0.084)          |        |
| <i>ph</i> <sub>2</sub>                                                                         |             | -0.097 (-0.141, -0.053)          |        |
| <i>ph</i> <sub>3</sub>                                                                         |             | 2.056 (1.564, 2.548)             |        |
| PaCO <sub>2</sub> associated with lowest pH (kPa) –<br>RCS(4.1, 5.6, 8.1)                      | 5.9 (2.0)   |                                  | <0.001 |
| <i>pc</i> <sub>1</sub>                                                                         |             | -0.0835 (-0.1016,<br>-0.0654)    |        |
| <i>pc</i> <sub>2</sub>                                                                         |             | 0.0987 (0.0788, 0.1187)          |        |
| Highest blood lactate (mmol l <sup>-1</sup> ) –<br>RCS(0.7, 1.5, 2.5, 8.3)                     | 2.8 (2.8)   |                                  | <0.001 |
| <i>bl</i> <sub>1</sub>                                                                         |             | 0.426 (0.368, 0.484)             |        |
| <i>bl</i> <sub>2</sub>                                                                         |             | -3.995 (-4.978, -3.011)          |        |
| <i>bl</i> <sub>3</sub>                                                                         |             | 6.742 (4.990, 8.495)             |        |
| Urine output (ml) –<br>RCS(147, 1165, 1972, 4309)                                              | 1834 (1703) |                                  | <0.001 |
| <i>up</i> <sub>1</sub>                                                                         |             | -0.00102 (-0.00111,<br>-0.00093) |        |
| <i>up</i> <sub>2</sub>                                                                         |             | 0.00207 (0.00170,<br>0.00243)    |        |
| <i>up</i> <sub>3</sub>                                                                         |             | -0.00378 (-0.00469,<br>-0.00286) |        |
| Highest serum sodium (mmol l <sup>-1</sup> ) –<br>RCS(133, 139, 145)                           | 138.9 (5.3) |                                  | <0.001 |
| <i>na</i> <sub>1</sub>                                                                         |             | -0.0517 (-0.0557,<br>-0.0476)    |        |
| <i>na</i> <sub>2</sub>                                                                         |             | 0.0521 (0.0479, 0.0563)          |        |
| Highest serum urea (mmol l <sup>-1</sup> ) –<br>RCS(2.7, 5.6, 9.4, 28.4)                       | 10.2 (9.5)  |                                  | <0.001 |
| <i>ur</i> <sub>1</sub>                                                                         |             | 0.170 (0.154, 0.186)             |        |

|                                                                                               |              |                                     |        |
|-----------------------------------------------------------------------------------------------|--------------|-------------------------------------|--------|
| <i>ur</i> <sub>2</sub>                                                                        |              | -0.626 (-0.841, -0.412)             |        |
| <i>ur</i> <sub>3</sub>                                                                        |              | 0.847 (0.457, 1.237)                |        |
| Highest serum creatinine (per 10 μmol l <sup>-1</sup> ) – RRCS(45, 74, 115, 423)              | 141 (155)    |                                     | <0.001 |
| <i>cr</i> <sub>1</sub>                                                                        |              | 0.0213 (0.0198, 0.0228)             |        |
| <i>cr</i> <sub>2</sub>                                                                        |              | -0.0324 (-0.0527, -0.0120)          |        |
| <i>cr</i> <sub>3</sub>                                                                        |              | 0.0053 (0.0024, 0.0081)             |        |
| <i>cr</i> <sub>4</sub>                                                                        |              | 0.00015 (-0.00016, 0.00047)         |        |
| <i>cr</i> <sub>5</sub>                                                                        |              | -0.0000035 (-0.0000053, -0.0000018) |        |
| Lowest white blood cell count (×10 <sup>9</sup> l <sup>-1</sup> ) – RCS(3.6, 8.7, 12.6, 23.4) | 11.8 (8.9)   |                                     | <0.001 |
| <i>wbc</i> <sub>1</sub>                                                                       |              | -0.041 (-0.050, -0.033)             |        |
| <i>wbc</i> <sub>2</sub>                                                                       |              | 0.220 (0.182, 0.258)                |        |
| <i>wbc</i> <sub>3</sub>                                                                       |              | -0.583 (-0.685, -0.482)             |        |
| Lowest platelet count (×10 <sup>9</sup> l <sup>-1</sup> ) – RCS(60, 164, 232, 410)            | 211 (111)    |                                     | <0.001 |
| <i>plc</i> <sub>1</sub>                                                                       |              | -0.0054 (-0.0058, -0.0049)          |        |
| <i>plc</i> <sub>2</sub>                                                                       |              | 0.0149 (0.0131, 0.0168)             |        |
| <i>plc</i> <sub>3</sub>                                                                       |              | -0.0404 (-0.0462, -0.0345)          |        |
| Calendar time (per year)                                                                      | -            | -0.029 (-0.037, -0.021)             | <0.001 |
| Month of admission                                                                            |              |                                     | <0.001 |
| January                                                                                       | 35,944 (8.6) | 0                                   |        |
| February                                                                                      | 33,635 (8.0) | -0.013 (-0.059, 0.033)              |        |
| March                                                                                         | 37,100 (8.9) | -0.001 (-0.047, 0.045)              |        |
| April                                                                                         | 32,446 (7.8) | -0.030 (-0.076, 0.015)              |        |
| May                                                                                           | 34,374 (8.2) | -0.052 (-0.102, -0.003)             |        |
| June                                                                                          | 33,774 (8.1) | -0.055 (-0.100, -0.010)             |        |
| July                                                                                          | 35,190 (8.4) | -0.082 (-0.130, -0.035)             |        |
| August                                                                                        | 33,452 (8.0) | -0.045 (-0.095, 0.004)              |        |
| September                                                                                     | 34,151 (8.2) | -0.080 (-0.122, -0.038)             |        |
| October                                                                                       | 36,505 (8.7) | -0.013 (-0.061, 0.035)              |        |
| November                                                                                      | 35,486 (8.5) | -0.009 (-0.052, 0.034)              |        |
| December                                                                                      | 35,899 (8.6) | -0.027 (-0.079, 0.025)              |        |

CI, confidence interval; CPR, cardiopulmonary resuscitation; ED, emergency department; GCS, Glasgow coma scale; LOS, length of stay; RCS( $k_1, \dots, k_n$ ), restricted cubic spline with knots at positions  $k_1, \dots, k_n$ ; RRCS( $k_1, \dots, k_n$ ), right-restricted cubic spline with knots at positions  $k_1, \dots, k_n$ ; SD, standard deviation

Restricted cubic spline base variables  $x_1, \dots, x_{n-1}$  for covariate  $x$  with knots at  $k_1, \dots, k_n$  are calculated as:

$$x_1 = x$$

$$x_{j+1} = \{\max(x - k_j, 0)\}^3 - [(k_n - k_j) \max(x - k_{n-1}, 0)]^3 - (k_{n-1} - k_j) \max(x - k_n, 0)^3 / \{(k_n - k_{n-1}) / \{(k_n - k_1)^2\}\}, j = 1, \dots, n-2$$

Right-restricted cubic spline base variables  $x_1, \dots, x_{n+1}$  for covariate  $x$  with knots at  $k_1, \dots, k_n$  are calculated as:

$$x_1 = -x$$

$$x_{j+1} = \max(k_j - x, 0)^3, j = 1, \dots, n$$



<sup>a</sup> Alcohol related disorders, alkalaemia, chromosomal deletion syndromes, contiguous gene syndromes, envenomation, fluid overload, haemorrhage, hypercalcaemia, hyperglycaemia, hypernatraemia, hyperthermia, hypocalcaemia, hypoglycaemia, inborn errors of metabolism, obesity, over-activity, sex chromosome disorders, starvation, trisomy, under-activity.

**Table S4. Change in the AUC for acute versus chronic models by number of days since ICU admission**

| Day | AUC (95% CI)         |                      | Difference in AUC (95% CI) |
|-----|----------------------|----------------------|----------------------------|
|     | Acute model          | Chronic model        |                            |
| 0   | 0.892 (0.891, 0.893) | 0.689 (0.687, 0.691) | 0.204 (0.202, 0.207)       |
| 1   | 0.881 (0.880, 0.882) | 0.687 (0.685, 0.689) | 0.194 (0.192, 0.197)       |
| 2   | 0.828 (0.826, 0.830) | 0.676 (0.674, 0.679) | 0.152 (0.149, 0.155)       |
| 3   | 0.789 (0.787, 0.792) | 0.668 (0.666, 0.671) | 0.121 (0.117, 0.124)       |
| 4   | 0.759 (0.756, 0.762) | 0.665 (0.662, 0.668) | 0.094 (0.090, 0.098)       |
| 5   | 0.735 (0.732, 0.738) | 0.664 (0.661, 0.668) | 0.071 (0.066, 0.076)       |
| 6   | 0.716 (0.713, 0.720) | 0.664 (0.660, 0.668) | 0.052 (0.047, 0.057)       |
| 7   | 0.702 (0.698, 0.706) | 0.666 (0.662, 0.671) | 0.036 (0.030, 0.041)       |
| 8   | 0.693 (0.688, 0.698) | 0.672 (0.668, 0.677) | 0.021 (0.015, 0.027)       |
| 9   | 0.684 (0.679, 0.689) | 0.673 (0.668, 0.678) | 0.011 (0.005, 0.017)       |
| 10  | 0.679 (0.674, 0.684) | 0.675 (0.669, 0.680) | 0.004 (-0.002, 0.011)      |
| 11  | 0.674 (0.669, 0.680) | 0.675 (0.669, 0.680) | -0.000 (-0.007, 0.007)     |
| 12  | 0.671 (0.665, 0.677) | 0.675 (0.669, 0.681) | -0.003 (-0.011, 0.004)     |
| 13  | 0.671 (0.665, 0.678) | 0.675 (0.669, 0.681) | -0.004 (-0.012, 0.004)     |
| 14  | 0.668 (0.661, 0.675) | 0.675 (0.668, 0.681) | -0.006 (-0.015, 0.002)     |
| 15  | 0.665 (0.658, 0.673) | 0.674 (0.666, 0.681) | -0.008 (-0.017, 0.001)     |
| 16  | 0.663 (0.656, 0.671) | 0.671 (0.663, 0.678) | -0.007 (-0.017, 0.002)     |
| 17  | 0.661 (0.653, 0.669) | 0.671 (0.663, 0.679) | -0.010 (-0.020, -0.000)    |
| 18  | 0.659 (0.650, 0.667) | 0.671 (0.663, 0.679) | -0.012 (-0.023, -0.002)    |
| 19  | 0.661 (0.652, 0.670) | 0.669 (0.660, 0.678) | -0.009 (-0.020, 0.002)     |
| 20  | 0.656 (0.647, 0.666) | 0.666 (0.657, 0.675) | -0.010 (-0.021, 0.002)     |
| 21  | 0.656 (0.646, 0.666) | 0.665 (0.655, 0.675) | -0.009 (-0.021, 0.003)     |
| 22  | 0.651 (0.640, 0.661) | 0.665 (0.655, 0.675) | -0.014 (-0.027, -0.001)    |
| 23  | 0.648 (0.637, 0.658) | 0.663 (0.652, 0.673) | -0.015 (-0.028, -0.002)    |
| 24  | 0.646 (0.635, 0.657) | 0.661 (0.650, 0.672) | -0.015 (-0.029, -0.001)    |
| 25  | 0.644 (0.632, 0.656) | 0.659 (0.647, 0.670) | -0.015 (-0.029, -0.000)    |
| 26  | 0.640 (0.628, 0.653) | 0.657 (0.644, 0.669) | -0.016 (-0.031, -0.001)    |
| 27  | 0.640 (0.627, 0.653) | 0.654 (0.641, 0.667) | -0.014 (-0.030, 0.002)     |
| 28  | 0.641 (0.627, 0.654) | 0.656 (0.643, 0.669) | -0.015 (-0.031, 0.001)     |

AUC, area under the receiver operating characteristic curve; CI, confidence interval

Figure S1. Calibration of day 0 models

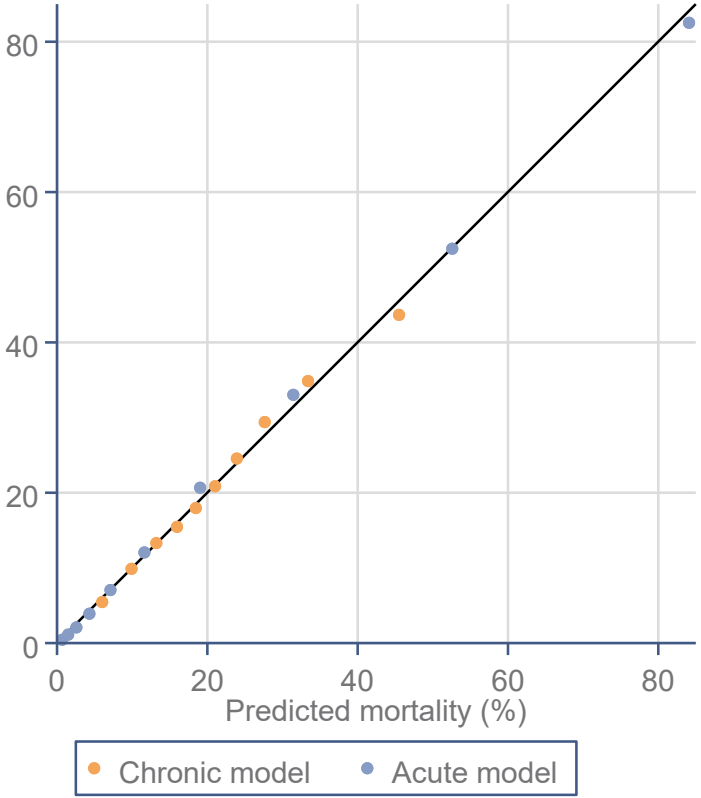

**Figure S2. Calibration of day 1-28 models**

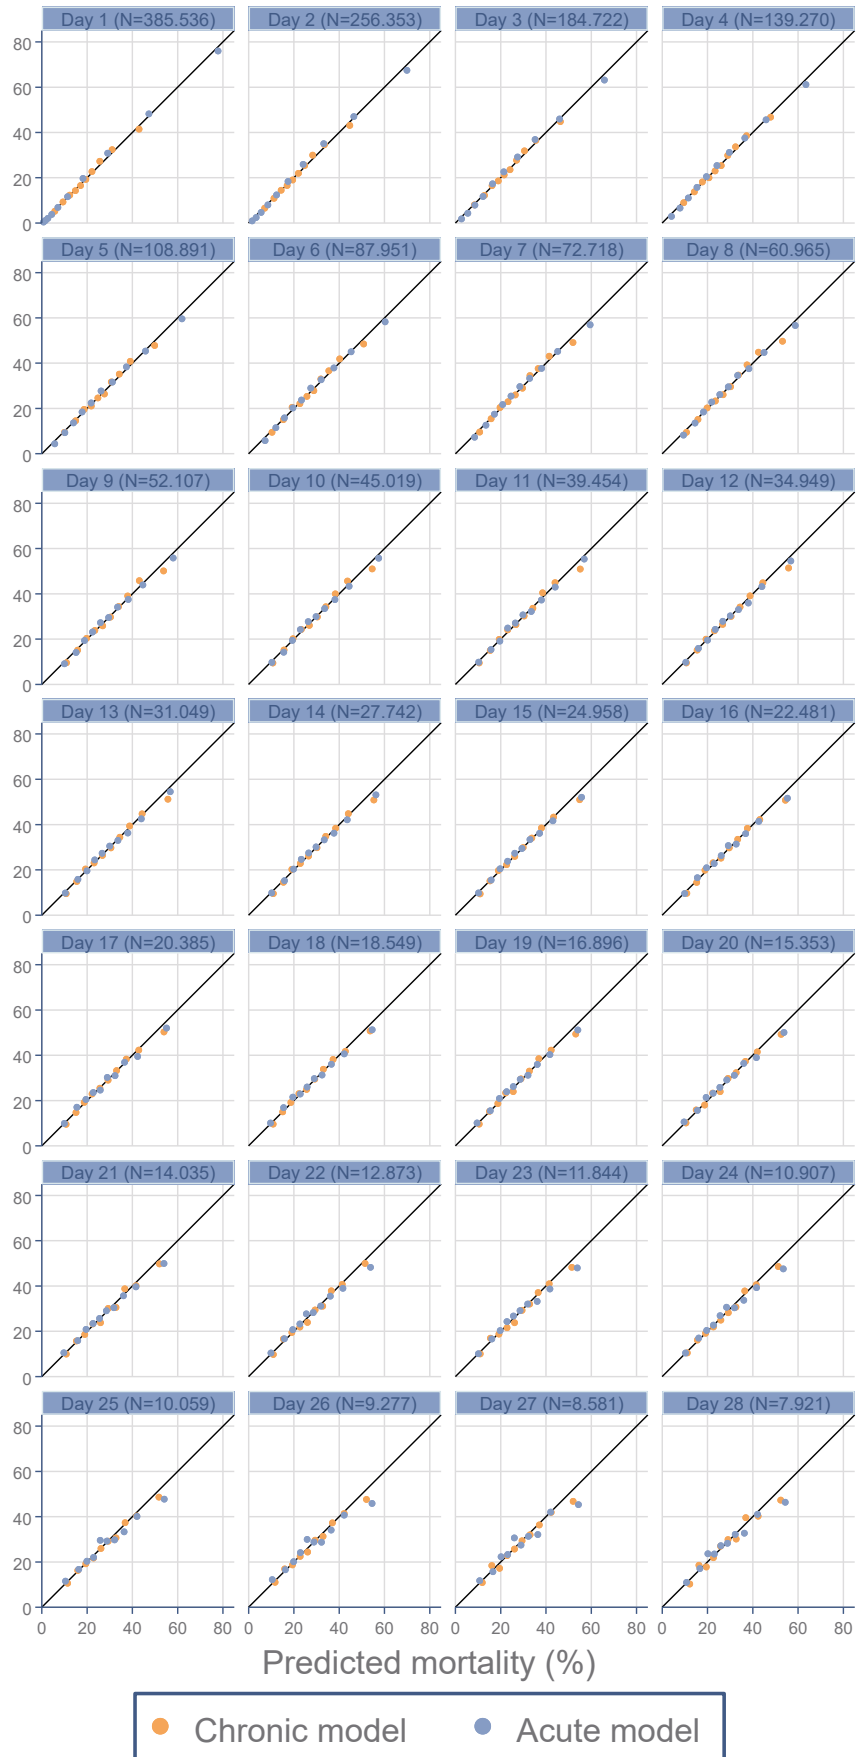

Supplement: sj-pdf-1-inc-10.1177_17511437211047180.pdf [file sj-pdf-1-inc-10.1177_17511437211047180.pdf]
